# Supplementary material for: Statistical framework for studying the spatial architecture of the tumor immune microenvironment
Source: bioRxiv or medRxiv preprint supplement (doi:10.1101/2021.04.27.21256104), 2021-04-29
Supplement: Supplementary file [file media-2.pdf]

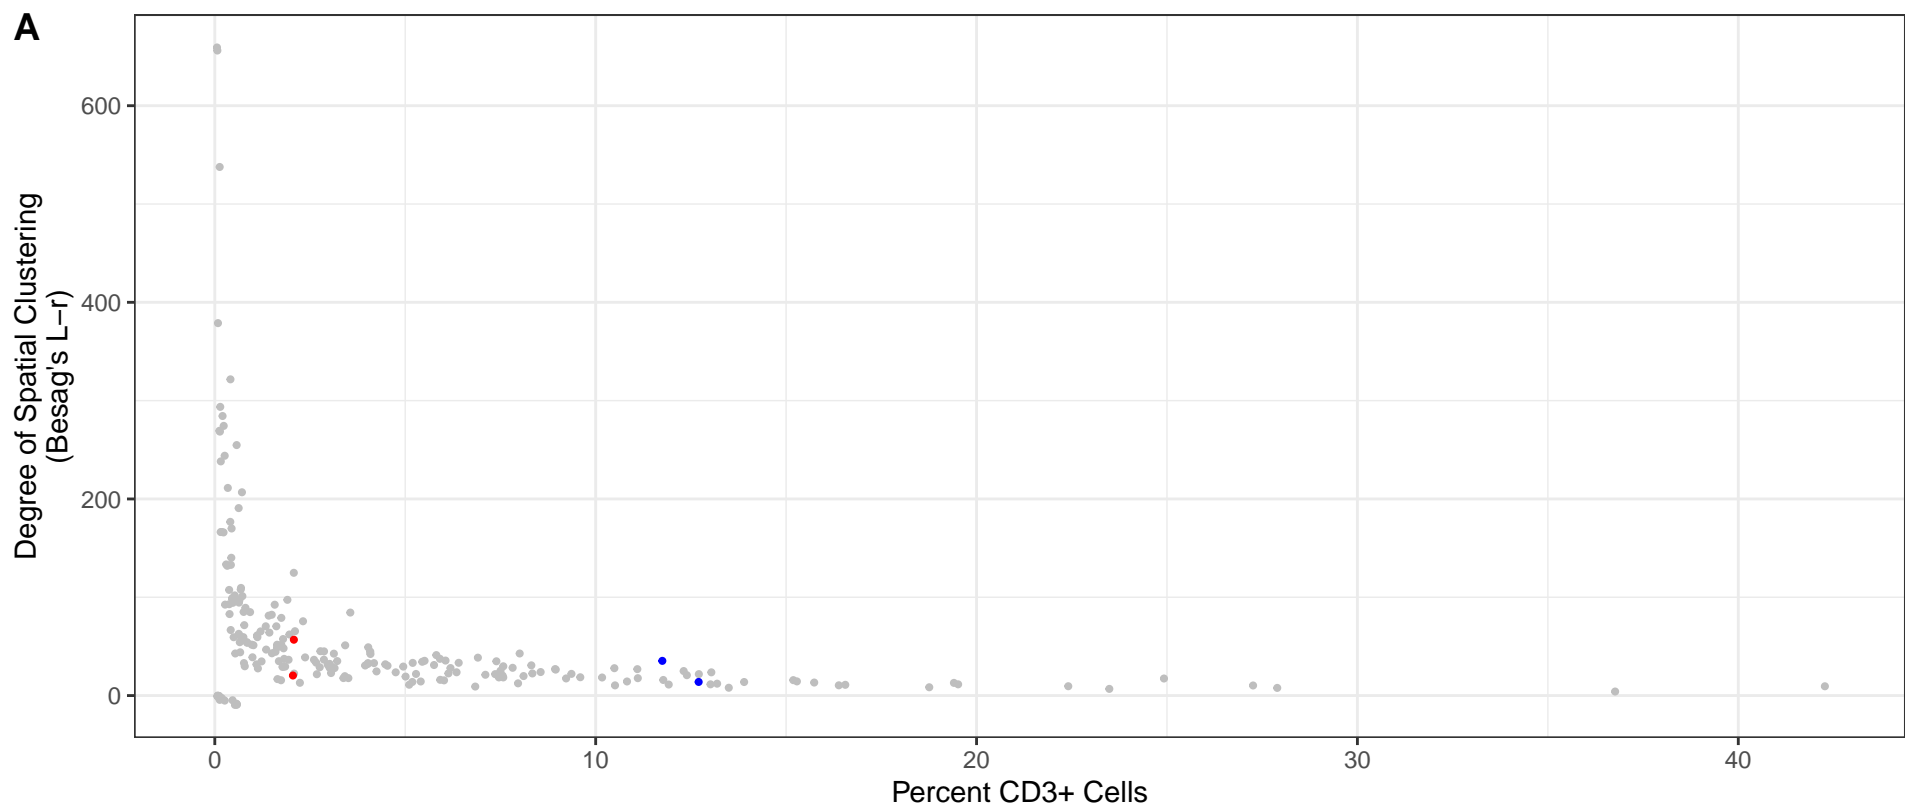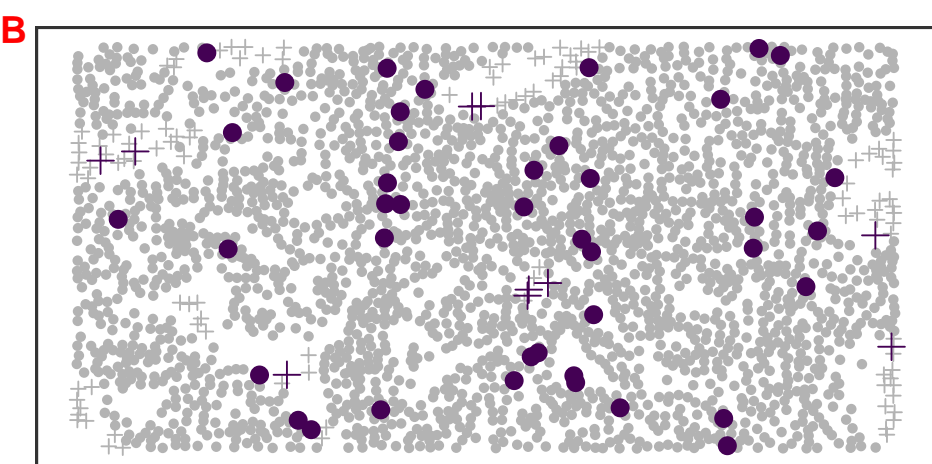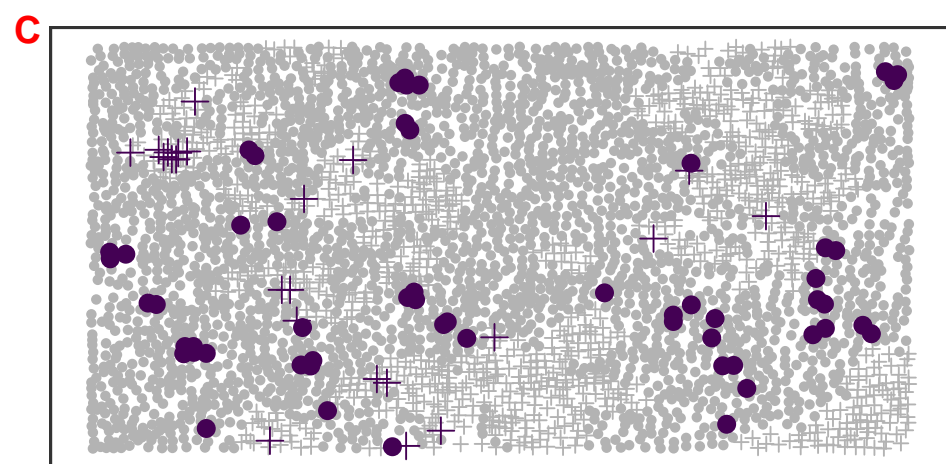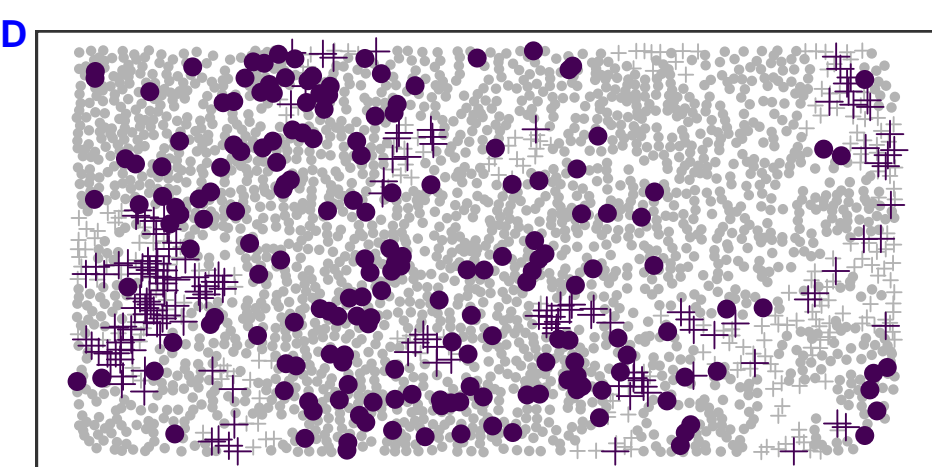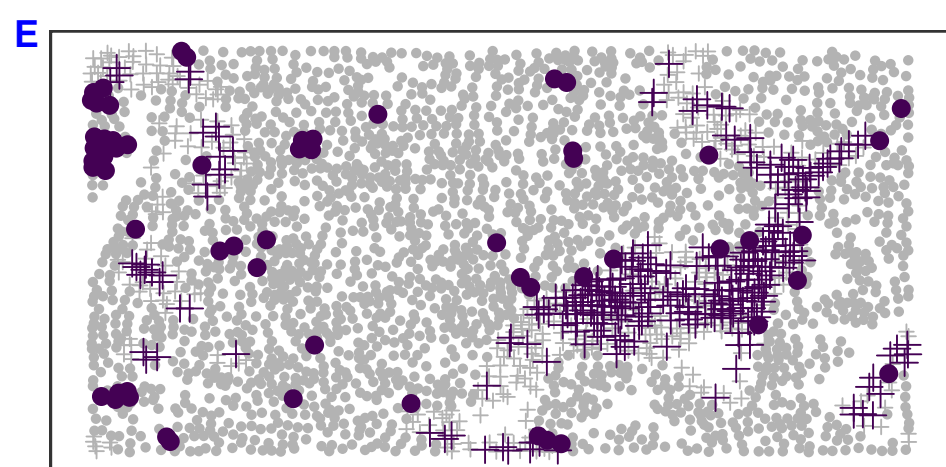

● CD3+    + Stroma    ● Tumor
